Type of contribution: *Research Article*

**Co-exposure to multiple *Ranavirus* types enhances viral infectivity and replication in a larval amphibian system**

Joseph R. Mihaljevic<sup>1,3\*</sup>, Jason T. Hoverman<sup>2</sup>, Pieter T.J. Johnson<sup>1</sup>

<sup>1</sup>Department of Ecology and Evolutionary Biology, University of Colorado, Boulder, CO, 80309

<sup>2</sup>Department of Forestry and Natural Resources, Purdue University, West Lafayette, IN 47907

<sup>3</sup>Present address: School of Informatics, Computing, and Cyber Systems, Northern Arizona University, Flagstaff, AZ, 86011

\*Corresponding author: [joseph.mihaljevic@nau.edu](mailto:joseph.mihaljevic@nau.edu)

Running head: Co-exposure to *Ranavirus* types

## 1 **Abstract**

2 Multiple pathogens commonly co-occur in animal populations, yet few studies  
3 demonstrate how co-exposure of individual hosts scales up to affect transmission. Although  
4 viruses in the genus *Ranavirus* are globally widespread and multiple virus species or strains  
5 likely co-occur in nature, no studies have examined how co-exposure affects infection dynamics  
6 in larval amphibians. We exposed individual *Rana aurora* (Northern red-legged frog) larvae to  
7 *Ambystoma tigrinum* virus (ATV), frog virus 3 (FV3), or an FV3-like strain isolated from a frog-  
8 culturing facility in Georgia, USA (RCV-Z2). We compared single-virus to pairwise co-  
9 exposures, while experimentally accounting for dosage. Co-exposure to ATV and FV3-like  
10 strains resulted in almost twice as many infected individuals compared to single-virus exposures,  
11 suggesting an effect of co-exposure on viral infectivity. The viral load in infected individuals  
12 exposed to ATV and FV3 was also higher than the single-dose FV3 treatment, suggesting an  
13 effect of co-exposure on viral replication. In a follow-up experiment, we examined how the co-  
14 occurrence of ATV and FV3 affected epizootics in mesocosm populations of larval *Pseudacris*  
15 *triseriata* (Western chorus frog). Although ATV did not generally establish within host  
16 populations (<4% prevalence), when ATV and FV3 were both present, this co-exposure resulted  
17 in a larger epizootic of FV3. Our results emphasize the importance of multi-pathogen  
18 interactions in epizootic dynamics and have management implications for natural and  
19 commercial amphibian populations.

## 20 **Introduction**

21           Classic theory and empirical research on infectious disease, in both wildlife and humans,  
22 has predominantly focused on the interaction between a single host and a single pathogen  
23 (Anderson et al. 1992, Hudson et al. 2002, Keeling & Rohani 2008, Rigaud et al. 2010,  
24 Tompkins et al. 2010). While substantial biological insights have been derived from such studies,  
25 multiple pathogens often co-occur (Petney & Andrews 1998, Pedersen & Fenton 2006, Balmer  
26 & Tanner 2011, Knowles et al. 2013, Griffiths et al. 2014, Stutz et al. 2018) and can result in  
27 transmission dynamics that deviate from classical expectations (Alizon et al. 2013a, Johnson et  
28 al. 2015, Seabloom et al. 2015), especially if host individuals become simultaneously or  
29 sequentially infected with different pathogens (i.e. co-infected or super-infected, respectively).

30           Research in a variety of systems has shown that ecological interactions among pathogens  
31 within a host, such as priority effects, competition, and facilitation, alter pathogen replication  
32 rates, probability of infection, clearance rates, and host survival (de Roode et al. 2005, Pedersen  
33 & Fenton 2006, Johnson & Hoverman 2012, Johnson, Preston, Hoverman, & LaFonte 2013,  
34 Nunn et al. 2014, Seabloom et al. 2015). While modeling studies have demonstrated how these  
35 within-host dynamics can scale up to affect transmission dynamics within host populations  
36 (Mideo et al. 2008, Alizon 2013), empirical studies linking scales in natural systems are limited.  
37 A notable exception involves de-worming experiments in wild buffalo populations, which show  
38 that co-infection with nematodes and the bacterial agent of tuberculosis increases host mortality  
39 (Jolles et al. 2008, Ezenwa & Jolles 2015). In an epidemiological model of the system, increased  
40 removal of hosts due to co-infection limited tuberculosis transmission in a manner consistent  
41 with large-scale epidemiological patterns in the field (Jolles et al. 2008, Ezenwa & Jolles 2015).  
42 Understanding how pathogen co-exposure affects pathology and transmission requires more

43 studies that explore the impacts of pathogen co-exposure across multiple biological scales  
44 (Mihaljevic 2012, Gog et al. 2014, Buhnerkempe et al. 2015, Johnson et al. 2015).

45 Viruses of the genus *Ranavirus* (family: Iridoviridae) provide a tractable and relevant  
46 model system for exploring the effects of multiple pathogens at both the within- and among-host  
47 spatial scales. Ranaviruses infect amphibian communities globally and can cause massive die-off  
48 events (up to 100% mortality), constituting a major threat to wild and commercially maintained  
49 amphibian populations (Gray et al. 2009b, Lesbarrères et al. 2012, Gray & Chinchar 2015).

50 There are several reasons to suspect that co-exposure to multiple *Ranavirus* types (e.g. viral  
51 species or strains) could be common in nature and influence transmission dynamics. First, this  
52 viral genus is genetically and ecologically diverse, with different type species and strains that  
53 show variability in epidemiological traits. For instance, two species of the genus common to  
54 North America – *Ambystoma tigrinum virus* (ATV) and *Frog virus 3* (FV3) – can easily be  
55 differentiated based on genomic characteristics, but also by their variability in infectivity, with  
56 ATV being more host-specific to salamanders (urodeles) and FV3 being more host-generalist,  
57 capable of infecting amphibians, reptiles, and some fish (Chinchar et al. 2009, 2011, 2017).

58 Furthermore, unique strains of ATV and FV3 differ in the rates at which they cause host  
59 mortality, which we refer to as virulence (Brunner & Collins 2009, Hoverman et al. 2010).

60 Finally, both ATV and FV3 can be highly prevalent across the landscape, and their spatial  
61 distributions broadly overlap (Tornabene et al., Gray et al. 2007, Ridenhour & Storfer 2008,  
62 Greer et al. 2009, Brunner et al. 2011, Hoverman, Mihaljevic, et al. 2012, Gray & Chinchar  
63 2015), suggesting a high potential for co-occurrence. To date, however, no studies have  
64 considered the effect of multiple *Ranavirus* species or strains on disease outcomes or epizootics.

65 While ATV has high infectivity in salamanders (Picco et al. 2007, Brunner & Collins

66 2009), there is mixed evidence that strains of ATV are able to infect anuran (frog and toad)  
67 larvae (Jancovich et al. 2001, Schock et al. 2008). For example, of the three frog species  
68 experimentally exposed to ATV by Schock et al. (2008), all three species showed susceptibility  
69 to ATV infection, and a small proportion of individuals died of ATV-induced disease. However,  
70 Jancovich et al. (2001) exposed two frog species to ATV – including a different population of  
71 one species also studied by Schock et al. (2008) – and found no signs of infection. Together,  
72 these data suggest that ATV infections in anurans are possible, though the probability of  
73 infection likely varies among species and populations, and possibly among ATV strains. FV3, in  
74 contrast, shows high infectivity among diverse host species, and infection often leads to  
75 mortality in both anuran and salamander larvae (Brunner et al. 2005, Picco et al. 2007, Schock et  
76 al. 2008, Hoverman et al. 2010, 2011). Given that anurans and salamanders often co-occur as  
77 larvae (Hoverman, Gray, et al. 2012, Johnson, Preston, Hoverman, & Richgels 2013) and that  
78 ranaviruses infect multiple host species, it is likely that co-exposure and subsequent within-host  
79 interactions between virus types is relatively common in nature.

80         Here, we examined the effects of co-exposure to ATV and FV3 on mortality and  
81 transmission dynamics in larval amphibians. We conducted two experiments to assess how the  
82 effects of co-exposure scale-up from within-host outcomes to between-host transmission,  
83 ultimately affecting epizootics. Theory suggests that the effect on co-exposure on transmission  
84 will depend on disease outcomes and pathogen replication within hosts (Pedersen & Fenton  
85 2006, Jolles et al. 2008, Mideo et al. 2008, Ezenwa & Jolles 2011). For instance, if within-host  
86 interactions lead to more rapid host death, then transmission of co-occurring pathogens could be  
87 dampened, leading to smaller epizootics. However, if co-exposure facilitates the invasion of  
88 pathogens, enhances within-host replication, or increases host tolerance to infection,

89 transmission could be enhanced, leading to larger epizootics (Mideo et al. 2008, Ezenwa & Jolles  
90 2011, Sofonea et al. 2015). *A priori* we expected that, due to the generally high infectivity and  
91 virulence of both ATV and FV3, co-exposure would increase host mortality and therefore limit  
92 epizootic size. To test these expectations, we performed experimental infections at two scales.  
93 We first exposed larval frogs individually to one or two virus types to determine how co-  
94 exposure affected mortality rate, the probability of infection, and within-host viral replication.  
95 We then conducted an experiment using replicate populations of larval frogs. Here, we pre-  
96 exposed larvae to either FV3 or ATV, and we added these individuals to small populations of  
97 susceptible larval frogs to explore how co-exposure affected the proportion of individuals  
98 infected and the average viral load. Our results indicated that co-exposure enhances viral  
99 infectivity and viral replication, illustrating the need to further explore how *Ranavirus* types are  
100 distributed across the landscape and how this might affect epizootics.

101

## 102 **Materials and Methods**

103 *Viruses and culturing.* Aliquots of *Ambystoma tigrinum* virus (ATV; Regina ranavirus  
104 (RRV) #11800) and frog virus 3 (FV3; #061405) were generously provided by V. Gregory  
105 Chinchar. The RRV strain of ATV was originally isolated in 1997 from *Ambystoma tigrinum* in  
106 Regina, Saskatchewan, Canada (Bollinger et al. 1999), and the FV3 strain is also a wild-type  
107 strain isolated from *Rana pipiens* populations of the Midwestern United States in the 1960's  
108 (Granoff et al. 1965). An aliquot of the *Rana catesbeiana* virus (RCV-Z2) strain of FV3  
109 (hereafter referred to as R-FV3) isolated from a ranaculture facility in Georgia in 2006, was  
110 generously provided by Matthew Gray and Debra Miller (GenBank accession no. EF101698;  
111 Miller and Rajeev 2007, Claytor et al. 2017). This strain was the cause of a die-off event in the

112 facility's bullfrog population, and is twice as virulent as wild-type FV3 in some amphibian  
113 species (Hoverman et al. 2010). We propagated the three viruses through immortalized fathead  
114 minnow (FHM) cells fed with Eagle's minimum essential medium (MEM) with Hank's salts,  
115 containing 5% fetal calf serum. Titer of the resulting viral stocks was determined by plaque  
116 assays using serial dilutions of the stock, resulting in titers represented in plaque forming units  
117 (PFU). It is important to note that we were unable to obtain an accurate titer of the R-FV3 stock  
118 before the start of the first experiment, which likely explains the observed lower-than-expected  
119 infectivity.

120 *Experiment 1: Individual-level.* This experiment assessed the individual, host-level  
121 effects of co-exposure to ATV and FV3. Egg masses of *Rana aurora* were field-collected from  
122 wetlands in Oregon in spring 2012 and shipped to the University of Colorado at Boulder. Egg  
123 masses were first washed with sterile deionized water to remove any possible residual virions  
124 and were then placed into plastic containers for rearing. Larvae were reared at 20°C with a 12:12  
125 hour day:night photoperiod and fed ground TetraMin® fish flakes (Tetra) *ad libitum* until  
126 reaching Gosner stage 30 (Gosner 1960). At this time, larvae were randomly placed into  
127 individual, covered plastic containers (with drilled air holes) filled with 1-L of carbon-filtered,  
128 UV-sterilized water and allowed to acclimate for 24h. A subset of 15 larvae were euthanized by  
129 immersion in 1% buffered MS-222 and tested for infection to verify that none of the larvae  
130 harbored latent infections prior to experimentation (see quantitative PCR methods below). None  
131 of these individuals tested positive for ranaviruses.

132 Twenty-five larvae were assigned to each of 10 experimental treatment groups: a no-virus  
133 control, single dose of each virus alone (n=3 treatments), double dose of each virus alone (n=3  
134 treatments), and each pairwise combination of the three viruses (i.e. a single dose of each of two

135 viruses; n=3 treatments). Using this experimental design, we were able to account for additive  
136 and substitutive effects (e.g. dosage effects vs. effects of multiple strains). The control treatment  
137 consisted of a sham exposure to a 60 $\mu$ L aliquot of virus-free MEM. On 22 May 2012, a single  
138 dose ( $\sim 1 \times 10^6$  PFU) or double dose ( $\sim 2 \times 10^6$  PFU) of the respective virus or viruses was added to  
139 each larva's container via sterile pipette tip. Thus, larvae were passively exposed to each virus  
140 inoculate, which likely better mimics natural transmission conditions relative to injection-based  
141 methods.

142         After virus addition, individuals were fed *ad libitum* every other day for the extent of the  
143 experiment. Complete water changes were conducted with carbon-filtered, UV-sterilized water  
144 every 4 days post-exposure (dpe) to ensure adequate water quality for the larvae. Standard  
145 protocols to avoid cross contamination between containers involved sterilizing dip nets with a  
146 10% bleach solution for 10 minutes, followed by rinsing with sterile water to remove any  
147 residual bleach. Container and experimental room surfaces were cleaned with a 2% solution of  
148 Nolvasan between each container's water changes, allowed to sit for 10 minutes, and then rinsed  
149 with sterile water.

150         The experiment ran for 21 d and mortality of larvae was monitored daily. If an individual  
151 died, the individual was extracted from its container, rinsed thoroughly with de-ionized water to  
152 remove any non-infecting virions that may have adhered to the individual's skin, and then the  
153 entire individual was placed into a microcentrifuge tube and stored at -20°C for later processing.  
154 After 21d, all surviving larvae were euthanized in 1% buffered MS-222. These individuals were  
155 then washed thoroughly with de-ionized water, placed into individual microcentrifuge tubes, and  
156 stored at -20°C for later processing.

157         *Experiment 2: Population-level.* A follow-up experiment tested how co-occurrence of



158 ATV and FV3 in a larval amphibian population would affect transmission dynamics. Because the  
159 first, individual-level experiment showed qualitatively similar effects of co-exposure in the  
160 ATV+FV3 and ATV+R-FV3 treatments (see Results below), only ATV and FV3 were used for  
161 this experiment. In the spring of 2013, we were unable to obtain more *R. aurora* egg masses;  
162 instead, we collected egg masses of *Pseudacris triseriata* from local sites in Colorado, washed  
163 them with sterile deionized water, and reared them in plastic containers at 20°C with a 12:12  
164 hour day:night photoperiod. Hatching larvae were fed ground TetraMin® fish flakes (Tetra) *ad*  
165 *libitum* until reaching Gosner stage 30 (Gosner 1960).

166         The overall design of the experiment was to establish replicate populations of 10  
167 uninfected larvae and then introduce 2 previously virus-exposed larvae into each population to  
168 track the spread of virus and determine if co-occurrence of ATV and FV3 alters the rate of  
169 spread and overall epizootic size. We used this method of transmission, instead of using passive  
170 exposure to MEM-suspended virus, because we wanted to assure that the behavior of infected  
171 hosts was allowed to affect transmission. To generate infected hosts for addition to the  
172 experimental populations, we randomly assigned a subset of the larvae to one of three exposure  
173 groups: FV3-exposure, ATV-exposure, and sham-exposure. Larvae were housed in 50-L covered  
174 plastic tubs (with drilled air holes) at densities no greater than 1 larva per liter of water. On 20  
175 June 2013, larvae were passively batch-exposed to a dosage of  $5 \times 10^6$  PFU L<sup>-1</sup> water of the  
176 respective virus or a sham exposure with an equivalent volume of virus-free MEM, using batches  
177 of 50 larvae. Larvae were held in these containers for 4d to initiate infection. In order to later  
178 identify which individuals were previously exposed, before adding the exposed individuals to the  
179 susceptible populations, we sedated each exposed individual and used a pair of micro-scissors to  
180 create a notch on the posterior, dorsal end of the tail. Unfortunately, these notches had healed by

181 the end of the experiment and it was exceedingly difficult to identify which individuals were  
182 previously exposed.

183 Uninfected (i.e. susceptible) experimental populations were also established on 20 June  
184 2013. We randomly selected 10 unexposed larvae and placed them in 15-L covered plastic tubs  
185 (with drilled air holes) filled with 12-L of carbon-filtered, UV-sterilized water. After the 4d  
186 batch-exposure, on 24 June 2013, each uninfected population received one of the following  
187 combinations of exposed larvae: (1) two sham-exposed larvae, (2) two FV3-exposed larvae, (3)  
188 two ATV-exposed larvae, or (4) one FV3-exposed larvae and one ATV-exposed larvae. Thus,  
189 each microcosm population contained 12 total *P. triseriata* larvae (10 susceptible and 2 exposed)  
190 for a total density 1 larva per liter of water. Each of the four treatments was replicated 6 times for  
191 a total of 24 experimental units.

192 We destructively sampled three replicates four days after the addition of the two exposed  
193 tadpoles (4dpe). This sample allowed us to establish an early epizootic time-point for comparison  
194 to late-stage epizootics. Larvae were extracted from each tub and individually euthanized in 1%  
195 buffered MS-222. As above, larvae were rinsed, placed into individual microcentrifuge tubes,  
196 and stored at -20°C for later processing. Starting at 5dpe, 80% water changes were implemented  
197 every 4 days for each remaining replicate. Mortality was continually monitored, and any  
198 deceased individuals were extracted from tubs, rinsed, and stored, as above. At 21dpe, the  
199 experiment was terminated and individuals processed as described above.

200

201 *Tissue processing and DNA extraction.* Frozen samples were allowed to thaw to room  
202 temperature and 500µL of MEM was added to each microcentrifuge tube. The samples were then  
203 manually homogenized using a motorized homogenizer. This tissue homogenate was then

204 centrifuged at 3000g for 1min. A 500 $\mu$ L aliquot of the resulting supernatant solution was placed  
205 into a new sterile microcentrifuge tube and used for DNA extraction. Qiagen™ DNeasy Blood  
206 and Tissue extraction kits and standard protocols were used to extract 250 $\mu$ L of buffered DNA  
207 suspension from each supernatant aliquot. DNA samples were stored at -20°C for later  
208 processing.

209  
210 *Quantitative PCR amplification of viral DNA.* The viral load of each DNA extract (in viral copy  
211 number equivalents) was evaluated using quantitative polymerase chain reaction (qPCR),  
212 estimated by comparison to a dilution series of standard DNA. We created a synthetic double-  
213 stranded DNA standard by synthesizing a 250bp fragment of the major capsid protein (MCP)  
214 gene (gBlocks® Gene Fragments; Integrated DNA Technologies™), which is conserved among  
215 *Ranavirus* species (e.g. ~97% sequence similarity between ATV and FV3 strains). We used a 10-  
216 fold dilution series from 2x10<sup>8</sup> gene copies down to 2x10<sup>1</sup> gene copies of standard DNA.  
217 Standards and samples were run in duplicate.

218 The qPCR protocol amplifies a ~70bp region of the MCP, allowing the protocol to  
219 identify many *Ranavirus* species. However, importantly, the protocol cannot distinguish between  
220 virus species within a sample (Forson & Storfer 2006, Picco et al. 2007). Thus, we were unable  
221 to assess the simultaneous presence of virus types (i.e. co-infection). To test each sample for  
222 ranavirus infection, a 2.5 $\mu$ L volume of sample DNA was added to a reaction volume of 17.5 $\mu$ L  
223 containing the following reagents: 10 $\mu$ L TaqMan® 2X Universal PCR Master Mix (No  
224 AmpErase UNG), 0.06 $\mu$ L forward primer (for a final concentration of 0.1 $\mu$ M; 5' ACA CCA  
225 CCG CCC AAA AGT AC 3'), 0.18 $\mu$ L reverse primer (for a final concentration of 0.1 $\mu$ M; 5'  
226 CCG TTC ATG ATG CGG ATA ATG 3'), 0.05 $\mu$ L fluorescent TaqMan® probe (with a starting

227 concentration of 100pmol  $\mu\text{L}^{-1}$ ; 5' FAM-CCT CAT CGT TCT GGC CAT CAA CCA C-TAM  
228 3'), and 7.21 $\mu\text{L}$  molecular grade water (Forson & Storfer 2006, Picco et al. 2007). All custom  
229 primers and probes were ordered through Life Technologies™. Samples were run in 96-well  
230 plates on an Applied Biosciences® machine for 40 cycles: 95°C denaturing (20s), 54°C  
231 annealing (20s), and 72°C extension (30s). Two positive ATV and FV3 controls and two  
232 negative controls were run on each plate.

233         After qPCR analysis, the starting sample DNA concentrations of all virus-positive  
234 samples were estimated using a Quant-iT™ PicoGreen® dsDNA Assay Kit (Life  
235 Technologies™). All viral loads were standardized to viral copy number per ng of sample DNA.  
236 We also quantified the DNA concentration of a random subset of non-infected samples in order  
237 to verify that viral detection was not dependent on a high concentration of initial sample DNA.

238  
239 *Viral DNA sequencing of infected samples.* We attempted to sequence a small region of the viral  
240 genome from all infected samples in order to verify the identity of the infecting virus(es).  
241 However, this method is not reliable at determining if multiple virus types are coinfecting an  
242 individual, especially if there are rare variants. Therefore, this analysis determined only the  
243 identity of the virus with the most DNA present in the sample (i.e. the most abundant virus in a  
244 given individual). Still, this sequencing helped narrow down the mechanisms driving the effects  
245 of co-exposure. We amplified a ~350bp fragment of the MCP gene using a hemi-nested PCR  
246 protocol (Kattenbelt et al. 2000). The amplicon from each infected sample, along with a custom  
247 sequencing primer (5' ACT ATG CCA CCT CCA TC 3'), was sent to Quintara Biosciences™  
248 for Sanger sequencing. We also amplified and sequenced the same MCP gene fragment from the  
249 three *Ranavirus* strains used in the study (ATV, FV3, and R-FV3). We compared the sequencing

250 data from each infected sample to that of the original viral strains.

251 *Statistical analyses: Experiment 1.* All statistical analyses were conducted in the open-  
252 source software, *R* (R Core Development Team 2013). From the first experiment, we had three  
253 types of data for each of the 10 viral exposure treatments: survival, proportion of individuals  
254 becoming infected, and viral load per infected larva. We compared survival rates with a Mantel-  
255 Haenszel test, using the ‘*survival*’ package. We first compared among single- and double-dose  
256 single-virus treatments, with dosage as the predictor variable. Because we found no difference in  
257 the survival rate between single- and double-dosages for the single-virus exposures ( $\chi_1^2=2.6$ ;  
258  $P=0.11$ ), we then compared the double-dose, single-virus treatments to the co-exposure  
259 treatments and control. A Cox proportional hazards model yielded the same qualitative results.

260 We conducted our analyses of proportion infected and viral load using the Bayesian  
261 statistical programming language, *Stan*, interfacing through *R* via the package ‘*rstan*’. We use  
262 this method because of the language’s flexibility in specifying the model structures for our  
263 analyses. In all cases, we used broad, vague priors for model parameters. We have made our  
264 code publicly available at the following link:  
265 [https://bitbucket.org/jrmihalj/ranavirus\\_coexposure](https://bitbucket.org/jrmihalj/ranavirus_coexposure). To quantify the effects of virus identity,  
266 dosage, and co-exposure on the proportion of individuals that became infected, we conducted a  
267 logistic regression. Note that we conducted a similar analysis in the ‘*brglm*’ package in *R*, which  
268 uses a frequentist approach, and the results were qualitatively the same (not shown). The model  
269 that was fit in *Stan*, however, showed a more precise match between data and model predictions.

270 We structured our model as follows (using *R* linear model syntax for ease of  
271 interpretation):  $\text{Number\_Infected} \sim 0 + \text{ATV} + \text{FV3} + \text{RFV3} + \text{Double:ATV} + \text{Double:FV3} +$   
272  $\text{Double:RFV3} + \text{FV3:RFV3} + \text{ATV:RFV3} + \text{ATV:FV3}$ , where *Number\_Infected* follows a

273 binomial distribution, with  $k = 25$  (i.e. the number of individuals exposed in each treatment).  
274 Thus, our model estimated a baseline effect of each virus type (i.e. a single-dose effect), a virus-  
275 specific effect of double dosage, and then the interactions between each virus type. These  
276 interactions represent the effect of co-exposure, which is an effect above and beyond the effect of  
277 a double dosage. Each one of model effects is compared to an intercept of zero, which on the  
278 logit scale equals 50% prevalence. Thus, for instance, a strong negative effect of ATV would  
279 mean that far less than 50% of individuals became infected with a single dose of ATV. In  
280 general, we were interested in whether the co-exposure effects are larger than all of the double-  
281 dose effects, indicating significant synergy between the two co-inoculating viruses.

282 Finally, to compare viral loads among treatments, we followed a similar approach as our  
283 treatment of the data on proportion infected. This model only used viral load data from the  
284 individuals that became infected. We therefore constructed a linear model predicting the natural  
285 log-transformed average viral copy number per ng DNA for each infected individual (averaged  
286 over the duplicate qPCR runs). We used similar model structure as above, except in this case we  
287 estimated an intercept representing the average infection intensity, and we did not include the  
288 single or double-dose ATV treatments, due to lack of any infections. We also added a term  
289 accounting for whether or not the individual died during the experiment. The model structure  
290 was therefore:  $\text{Viral\_Load} \sim \text{Intercept} + \text{FV3} + \text{RFV3} + \text{Double:FV3} + \text{Double:RFV3} +$   
291  $\text{FV3:RFV3} + \text{ATV:RFV3} + \text{ATV:FV3} + \text{Died}$ . In this case, then, we were interested to see if the  
292 co-exposure groups had higher than average infection intensities, which again would indicate a  
293 synergistic effect of co-exposure.

294 *Statistical Analyses: Experiment 2.* Similar to the first experiment, the second experiment  
295 had three response variables: survival rate, infection prevalence, and average viral load.

296 However, this time, the response variables were population-specific, with 3 replicate populations  
297 per time-point (4dpe and 21dpe) and per treatment (FV3, ATV, FV3+ATV, Control). To  
298 compare survival among treatments, we used a Cox proportional hazards model with replicate  
299 population as a frailty term (i.e. analogous to random intercept term). We compared infection  
300 prevalence between the FV3 and FV3+ATV treatments by creating a generalized linear mixed  
301 effects model in *Stan* with prevalence explained by treatment, time (early vs. late), and their  
302 interaction. We excluded the ATV-only treatments due to the small number of infections and to  
303 simplify the analysis. The model was therefore of the form:  $\text{Number\_Infected} \sim \text{Treatment} +$   
304  $\text{Time} + \text{Treatment} * \text{Time}$ , where  $\text{Number\_Infected}$  follows a binomial distribution with  $k = 12$ ,  
305 the number of individuals in each replicate.

306 We similarly compared the viral load between the FV3 and FV3+ATV treatments by  
307 creating a linear mixed effects model with viral load (transformed as in the first experiment)  
308 explained by a treatment-by-time interaction, a fixed effect for whether the individual died or  
309 not, a fixed effect for day of death, and a random effect for replicate population. This model was  
310 of the form:  $\text{Viral\_Load} \sim \text{Intercept} + \text{Treatment} + \text{Time} + \text{Treatment} * \text{Time} + \text{Died} +$   
311  $\text{Random}(\text{Replicate})$ .

312

## 313 **Results**

### 314 *Experiment 1*

315 In the first experiment with *Rana aurora*, larvae experienced mortality throughout all  
316 treatments, including controls (Fig. A1). However, survival did not differ among treatments ( $\chi^2_6$   
317 = 6.2;  $p = 0.40$ ; Fig. A1). Infection prevalence in *R. aurora* ranged from 0-76%, with no  
318 individuals becoming infected in the sham control and no individuals becoming infected in the

319 ATV-only treatments (including single- and double-doses of ATV).

320           Importantly, co-exposure to ATV and either FV3 or RFV3 caused a synergistic effect,  
321 enhancing overall infectivity compared to the double-dose treatments of single virus types (i.e.  
322 ATV, FV3, and RFV3 alone; Fig. 1a). Thus, the infection prevalence in co-exposure groups was  
323 nearly twice as high as single-virus exposures. However, co-exposure to both FV3-like strains  
324 (i.e. FV3+RFV3) did not cause such an effect (Fig. 1a). Indeed in the statistical model, the co-  
325 exposure effects of ATV:FV3 and ATV:RFV3 were larger than all other effects (Table 1),  
326 demonstrating a synergistic effect of co-exposure on viral infectivity.

327           Infected individuals that died during the experiment had, on average, higher viral loads  
328 compared to infected individuals that survived to the end of the experiment (Table 2; Fig. A2).  
329 We also found that for RFV3, a double dose exposure led to a detectably higher average viral  
330 load compared to the single dose exposure, and there was a similar trend for FV3 (Fig 1b; Table  
331 2). The viral loads of the ATV+FV3 co-exposed individuals were higher than the loads of  
332 individuals exposed to a single dose of FV3, but there was no difference in viral load in the  
333 ATV+FV3 treatment compared to exposure to a double dose of FV3 (Fig. 1b; Table 2). The  
334 other co-exposure treatments (ATV+RFV3 and FV3+RFV3) had similar viral loads to the single-  
335 dose exposure treatments of FV3 and RFV3 (Fig. 1b; Table 2).

336           We successfully sequenced viral DNA from all but three of the infected individuals. The  
337 three individuals from which we did not successfully sequence had the three lowest viral loads.  
338 Sequencing results revealed that infected individuals were predominantly infected by the FV3-  
339 like strains. However, because FV3 and R-FV3 are indistinguishable based on this sequencing  
340 method, we could not reliably determine whether coinfection occurred (i.e. simultaneous  
341 presence of multiple virus types). Interestingly, four sequences from the R-FV3 single-virus



342 exposures and the ATV + R-FV3 exposures showed 100% sequence identity to one another but  
343 did not perfectly match the sequences of the three viruses used in this experiment. We searched  
344 for similar sequences on GenBank® via BLAST, which revealed a 100% match to an isolate of  
345 FV3 discovered in lungless salamanders of the Great Smokey National Park, TN (Gray et al.  
346 2009a). The source of this contamination – whether two viruses were co-isolated from the bull  
347 frog culturing facility, or whether the original R-FV3 stock was contaminated post-culturing – is  
348 unclear, but it is unlikely to have affected our results.

349

## 350 *Experiment 2*

351 No *Pseudacris triseriata* individuals died in the control group. Across all treatments, no  
352 individuals had died by 4 days post-exposure (dpe). Overall, only four individuals died in the  
353 ATV-only treatment (5.5% of all replicate individuals), and 12 (16%) and 14 (19%) individuals  
354 died in the FV3+ATV and FV3-only treatment replicates, respectively. When testing for an  
355 effect of co-exposure on survival rates, we found no overall difference between the survival rates  
356 in the FV3-only and FV3+ATV treatments ( $\chi^2_1 = 0.16$ ,  $p = 0.68$ ), although there was significant  
357 variation in survival rates among replicates ( $\chi^2_{1.42} = 5.3$ ,  $p = 0.038$ ).

358 No individuals in the control treatment became infected; however, unlike *R. aurora*,  
359 which showed no infectivity with ATV, three *P. triseriata* individuals in the ATV-only treatment  
360 became infected, which were detected in the three different replicates (one per replicate) at  
361 21dpe. Treatment and time post-exposure interacted to drive infection prevalence (Fig. 2; Table  
362 3); for the FV3-only treatment, the proportion of infected individuals increased more consistently  
363 and substantially over time compared to the FV3+ATV treatment (Fig. 2). All three replicates of  
364 the FV3-only treatment at 21dpe had the same proportion of individuals infected (8/12, 66%).

365 The FV3+ATV treatment replicates had more variable prevalence. In one of the FV3+ATV  
366 treatments at 4dpe, 9/12 (75%) of individuals were infected, which was a substantially larger  
367 proportion compared to all other 4dpe replicates, and the highest prevalence in the experiment  
368 overall (Fig. 2).

369 Individuals that died in the experiment had, on average, higher viral loads compared to  
370 infected individuals that were sampled prior to mortality (Fig. 3; Table 4). Because all of the  
371 individuals that died were in the 21dpe treatments, the average viral load increased between the  
372 4dpe and 21dpe treatments (Fig. 3). There were no overall effects of co-exposure on viral load in  
373 this experiment (Table 4).

374 We amplified and sequenced viral DNA from 85% of the infected individuals ( $n = 45 /$   
375 53). Of the three individuals that tested positive for infection in the ATV-only treatments, two  
376 DNA samples amplified, and their sequence data matched that of ATV, verifying that *P.*  
377 *triseriata* can become infected with ATV. All sequences from the FV3-only treatment matched  
378 FV3 DNA. Only one individual from the FV3+ATV treatment was infected with ATV, which  
379 was also the host with the highest observed viral load ( $4.76 \times 10^6$  viral DNA copies  $\text{ng}^{-1}$  DNA)  
380 and came from the replicate population with the highest infection prevalence (75% in the  
381 FV3+ATV, 4dpe treatment).

382

### 383 Discussion

384 We conducted experiments to identify the effects of co-exposure to multiple ranaviruses  
385 at the scale of both individual hosts and experimental populations. For individual hosts, co-  
386 exposure to *Ambystoma tigrinum* virus (ATV) and frog virus 3 (FV3) increased the infection  
387 success of FV3. However, this same effect did not hold for co-exposure to two more related

388 strains (FV3 and *Rana catesbeiana* virus (RCV-Z2), herein R-FV3), indicating that viral identity  
389 and viral relatedness may be important for predicting the outcome of co-exposure. At the host  
390 population-scale, we found some evidence that, when ATV co-occurs with FV3, co-exposure can  
391 lead to higher infection prevalence in the population. By conducting experiments at both the  
392 individual- and population-level scales, results of this study indicate that the co-occurrence of  
393 *Ranavirus* species has the potential to alter epizootic dynamics in natural amphibian populations.

394 In our first experiment, in which we exposed individual *Rana aurora* to multiple  
395 ranaviruses, we demonstrated several expected results that help validate our methods and  
396 experimental design. First, we found higher infection prevalence in the double-dose FV3  
397 treatment, compared to the single-dose FV3 treatment, showing that our chosen differences in  
398 dose led to measurable differences in infectivity. We also found higher viral loads in individuals  
399 that died compared to surviving individuals. This result is intuitive, especially considering  
400 evidence that the virulence of ranaviruses is at least partially associated with within-host viral  
401 replication (Brunner & Collins 2009). We also show that ATV is not highly infectious in larval  
402 frogs, corroborating previous findings (Jancovich et al. 2001, Schock et al. 2008); however, we  
403 demonstrate that *Pseudacris triseriata* is susceptible to this virus in our second experiment.  
404 Although mortality was high in our first experiment, the mortality patterns were consistent across  
405 treatments, and we believe that the basic results outlined above show that our methods were  
406 unbiased.

407 Critically, our first experiment provides evidence for an effect of co-exposure on viral  
408 infectivity and viral replication. The data suggest that co-exposure to ATV and FV3  
409 synergistically increased the host's probability of infection with FV3. This effect of co-exposure  
410 with ATV was seen with two FV3-like strains, wild-type FV3 and R-FV3. Notably, we saw this

411 co-exposure effect with ATV+R-FV3, even though we were unable to accurately quantify the  
412 titer of the R-FV3 stock, which demonstrates a robust effect of co-exposure on prevalence. We  
413 also saw that co-exposure to ATV and FV3 led to higher average viral load compared to the  
414 single-dose FV3 treatment. Given that no individuals became infected with ATV alone, and that  
415 the ATV+FV3 co-exposure constitutes a single dose of FV3, this latter result suggests a  
416 synergistic effect of co-exposure on viral replication within a host. We believe our results imply  
417 that ATV and FV3 likely either coinfecting or superinfected the hosts and that exposure to ATV  
418 facilitated the invasion and subsequent proliferation of FV3 within larvae (discussed more  
419 below).

420 Our second experiment, in which we exposed experimental populations of *P. triseriata* to  
421 multiple ranaviruses, provides some additional evidence for the effect of co-exposure on  
422 epizootics. Although we detected ATV infection in only one individual in the ATV+FV3  
423 treatment group, from one replicate population, this individual exhibited the highest overall viral  
424 load in our experiment, even after only 4dpe. This individual also was sampled from the replicate  
425 population with the largest epizootic in the experiment (75%). This evidence, in combination  
426 with the result that ATV only rarely infects these frogs, suggests that when ATV is able to  
427 establish infections in a population concurrent with FV3, there is the potential for larger  
428 epizootics.

429 We suspect that the effect of co-exposure was not as strong in the second experiment  
430 because of the difference in viral delivery and dosage, or perhaps host species identity.  
431 Specifically, ATV was only able to establish in one replicate co-exposure population (as  
432 evidenced by our sequencing methods), and we thus only saw one FV3+ATV co-exposure  
433 population with an effect. There are several plausible explanations for this outcome. First, the

434 majority of pre-exposed individuals may not have become infected, and therefore the susceptible,  
435 replicate populations were never exposed to ATV. Second, the pre-exposed individuals were  
436 infected, but cleared the infection prior to the population phase of the experiment. Or third, the  
437 pre-exposed individuals were infected with ATV but cleared the infection during the population  
438 phase of the experiment before ATV could infect other susceptible individuals. Because we were  
439 not successful in marking pre-exposed individuals, we cannot distinguish between these  
440 scenarios.

441 In the first experiment, each co-exposed individual was passively exposed to  $\sim 1 \times 10^6$  PFU  
442 of ATV in solution. However, in the second experiment, the susceptible larvae in the replicate  
443 populations could only become exposed to ATV if the pre-exposed individuals were infectious.  
444 Thus, it is likely that if we had passively exposed the replicate populations to ATV in a way  
445 similar to our first experiment, a larger effect of co-exposure would be seen. The differences in  
446 effects between the two experiments could also be due to differences in the effects of co-  
447 exposure among amphibian species. It is known that variability in FV3 infectivity among  
448 amphibian species has phylogenetic and ecological correlates (Hoverman et al. 2010, 2011).

449 Somewhat surprisingly, we did not see an effect of co-exposure on overall survival rates  
450 in our experiments. We ran our experiments for 21d, which in previous studies has been long  
451 enough to see 20-100% mortality due to ranavirus infection in other species of frogs and  
452 salamanders (Brunner et al. 2005, Hoverman et al. 2010). Given that case-mortality rates tend to  
453 be high (> 90%) for ranaviruses, it is likely that more individuals, especially in the co-exposure  
454 treatments with higher viral loads, would have died due to infection if we carried out the  
455 experiments for a longer time period.

456 Based upon the evidence from the first experiment, we propose two hypotheses for the

457 observed increase in infectivity and viral replication following host co-exposure to ATV and  
458 FV3. First, exposure to these two distinct virus types could lead to non-overlapping immune  
459 responses in the amphibian larvae, which leads to a trade-off that decreases the efficacy of the  
460 host's response to FV3, facilitating invasion. While there is ample evidence for resource  
461 competition in multi-strain infections (Read & Taylor 2001, Mideo et al. 2008, Alizon et al.  
462 2013b), few studies have documented the possible immune trade-offs imposed by multi-strain  
463 infections (Balmer & Tanner 2011). In the *Ranavirus* system, along with complex innate  
464 immune responses, *Xenopus laevis* adults produce long-lasting anti-FV3 IgY antibodies, and  
465 larvae produce less effective innate and adaptive responses (Chinchar et al. 2011, Chen & Robert  
466 2011). However, it is unknown if exposure to ATV elicits overlapping innate and adaptive  
467 responses with FV3. Future experiments that determine the degree of antibody specificity  
468 between ATV and FV3 and that alter the timing of exposure between FV3 and ATV may help to  
469 further test this hypothesis of the effect of co-exposure.

470 A second, alternative hypothesis for the effect of co-exposure is viral recombination. It is  
471 possible that, if ATV and FV3 coinfect the same host cells, recombination could occur to  
472 produce a novel, more infectious virus. Genomic evidence from multiple *Ranavirus* species  
473 suggests high recombination frequency and shows that these viruses are prone to host-shifts due  
474 to gene acquisition and subsequent adaptation (Jancovich et al. 2003, 2010, Abrams et al. 2013).  
475 Recombination has been employed to explain the collinearity and the one inversion between the  
476 ATV and FV3 genomes (Eaton et al. 2007). Furthermore, it was recently discovered that the R-  
477 FV3 strain we used here (RCV-Z2) is the product of a recombination event between an FV3-like  
478 strain and a common midwife toad virus (CMTV)-like strain from Europe, and this  
479 recombination is likely the cause of the high virus-induced mortality rate of this strain (Claytor et

480 al. 2017). This hypothesis of recombination could be tested by isolating many viruses from the  
481 co-exposure group via plaque assay, growing the viruses in culture, and conducting full genome  
482 sequencing and alignment to both FV3 and ATV.

483 Our results illustrate that in natural amphibian populations, co-occurrence of ATV and  
484 FV3 could alter epizootic dynamics. Specifically, if ATV can establish in a larval frog  
485 population, co-occurrence with FV3 could result in more infected individuals and subsequently  
486 higher mortality rates in the long run. This effect seems particularly relevant for wetlands in  
487 which salamanders and frogs cohabitate. If ATV is present and infects the local salamanders and  
488 FV3 establishes in the anuran populations, spillover of ATV from the salamanders could enhance  
489 FV3 epizootics in the frogs. Also, because FV3 is adept at infecting salamanders as well (Schock  
490 et al. 2008), it is likely that such a scenario would increase infection prevalence and intensity in  
491 the urodele population. Thus, our results illustrate the need to consider co-exposure and co-  
492 infection in the amphibian-*Ranavirus* system and emphasize the need for field data on ATV and  
493 FV3 co-occurrence at both the wetland- and host individual-levels.

494 This study adds to a growing body of literature that illustrates the important  
495 consequences of multi-pathogen interactions in mediating pathology and transmission.  
496 Furthermore, our results emphasize the importance of multi-scale experiments for understanding  
497 how interactions among pathogens influence transmission. In general, the impact of co-exposure  
498 on transmission will depend on how pathogen interactions within hosts feedback on between-  
499 host dynamics. In the *Ranavirus* system, co-exposure increased pathogen infection success and  
500 viral replication within hosts but did not result in more rapid host death, ultimately leading to  
501 increased transmission when both pathogens co-occurred. Research that integrates multi-scale  
502 experiments across a variety of systems will help us better understand the conditions under

503 which co-exposure will significantly impact epidemics and epizootics.

504

505 **Acknowledgements**

506 We would like to thank the Johnson Laboratory at CU-Boulder, particularly MB Joseph, for their  
507 helpful comments on a previous version of this manuscript. We are especially grateful to the hard  
508 work of two laboratory technicians, C. Ramsay and B. Camenga. This research was supported by  
509 the NSF Graduate Research Fellowship Program (DGE 1144083), the NSF (DEB-1149308) and  
510 NIH (R01GM109499), a Beverly Sears Graduate Student Research Grant, CU EBIO  
511 Departmental Research Grants, and the CU Natural History Museum Grant Program.



## References

- 512 Abrams AJ, Cannatella DC, Hillis DM, Sawyer SL (2013) Recent host-shifts in ranaviruses:  
513 signatures of positive selection in the viral genome. *J Gen Virol* 94:2082–93
- 514 Alizon S (2013) Co-infection and super-infection models in evolutionary epidemiology.  
515 *Interface Focus* 3:20130031
- 516 Alizon S, Roode JC de, Michalakis Y (2013a) Multiple infections and the evolution of virulence.  
517 *Ecol Lett* 16:556–567
- 518 Alizon S, Roode JC de, Michalakis Y (2013b) Multiple infections and the evolution of virulence.  
519 *Ecol Lett* 16:556–567
- 520 Anderson RM, May RM, Anderson B (1992) *Infectious Diseases of Humans: Dynamics and*  
521 *Control* (Oxford Science Publications). Oxford University Press, USA
- 522 Balmer O, Tanner M (2011) Prevalence and implications of multiple-strain infections. *Lancet*  
523 *Infect Dis* 11:868–78
- 524 Bollinger TK, Mao J, Schock D, Brigham RM, Chinchar VG (1999) Pathology, isolation, and  
525 preliminary molecular characterization of a novel iridovirus from tiger salamanders in  
526 Saskatchewan. *J Wildl Dis* 35:413–29
- 527 Brunner J, Barnett K, Gosier C (2011) Ranavirus Infection in Die-offs of Vernal Pool  
528 Amphibians in New York , USA. *Herpetol Rev* 42:76–79
- 529 Brunner J, Collins J (2009) Testing assumptions of the trade-off theory of the evolution of  
530 parasite virulence. *Evol Ecol Res* 11:1169–1188
- 531 Brunner JL, Richards K, Collins JP (2005) Dose and host characteristics influence virulence of  
532 ranavirus infections. *Oecologia* 144:399–406
- 533 Buhnerkempe MG, Roberts MG, Dobson AP, Heesterbeek H, Hudson PJ, Lloyd-smith JO  
534 (2015) Eight challenges in modelling disease ecology in multi-host , multi-agent systems.  
535 *Epidemics* 10:26–30
- 536 Chen G, Robert J (2011) Antiviral immunity in amphibians. *Viruses* 3:2065–86
- 537 Chinchar V, Hyatt A, Miyazaki T, Williams T (2009) Family Iridoviridae : Poor Viral Relations  
538 No Longer. *Lesser Known Large dsDNA ...*
- 539 Chinchar VG, Robert J, Storfer AT (2011) Ecology of viruses infecting ectothermic vertebrates -  
540 The impact of ranavirus infections on amphibians. *Stud Viral Ecol*:231–259
- 541 Chinchar VG, Waltzek TB, Subramaniam K (2017) Ranaviruses and other members of the  
542 family Iridoviridae: Their place in the virosphere. *Virology* 511:259–271
- 543 Claytor SC, Subramaniam K, Landrau-Giovannetti N, Chinchar VG, Gray MJ, Miller DL,  
544 Mavian C, Salemi M, Wisely S, Waltzek TB (2017) Ranavirus phylogenomics: Signatures  
545 of recombination and inversions among bullfrog ranaculture isolates. *Virology* 511:330–343
- 546 Eaton HE, Metcalf J, Penny E, Tcherepanov V, Upton C, Brunetti CR (2007) Comparative  
547 genomic analysis of the family Iridoviridae: re-annotating and defining the core set of  
548 iridovirus genes. *Virol J* 4:11
- 549 Ezenwa VO, Jolles AE (2011) From host immunity to pathogen invasion: the effects of helminth

- 550 coinfection on the dynamics of microparasites. *Integr Comp Biol* 51:540–51
- 551 Ezenwa VO, Jolles AE (2015) Opposite effects of anthelmintic treatment on microbial infection  
552 at individual versus population scales. *Science* (80- ) 347:175–177
- 553 Forson DD, Storfer A (2006) Atrazine increases ranavirus susceptibility in the tiger salamander,  
554 *Ambystoma tigrinum*. *Ecol Appl* 16:2325–32
- 555 Gog JR, Pellis L, Wood JLN, McLean AR, Arinaminpathy N, Lloyd-Smith JO (2014) Seven  
556 challenges in modeling pathogen dynamics within-host and across scales. *Epidemics* 10:45–  
557 48
- 558 Gosner KL (1960) A Simplified Table for Staging Anuran Embryos Larvae with Notes on  
559 Identification. *Herpetologica* 16:183–190
- 560 Granoff A, Came P, Rafferty K (1965) The isolation and properties of viruses from *Rana*  
561 *pipiens*: their possible relationship to the renal adenocarcinoma of the leopard frog. ... *New*  
562 *York Acad ...* 5176
- 563 Gray MJ, Chinchar VG (Eds) (2015) *Ranaviruses: Lethal Pathogens of Ectothermic Vertebrates*.
- 564 Gray M, Miller D, Hoverman J (2009a) First Report of Ranavirus Infecting Lungless  
565 Salamanders. *Herpetol Rev* 30:316–319
- 566 Gray M, Miller D, Hoverman J (2009b) Ecology and pathology of amphibian ranaviruses. *Dis*  
567 *Aquat Organ* 87:243–266
- 568 Gray MJ, Miller DL, Schmutzer AC, Baldwin CA (2007) Frog virus 3 prevalence in tadpole  
569 populations inhabiting cattle-access and non-access wetlands in Tennessee , USA. *Analysis*  
570 77:97–103
- 571 Greer AL, Brunner JL, Collins JP (2009) Spatial and temporal patterns of *Ambystoma tigrinum*  
572 virus (ATV) prevalence in tiger salamanders *Ambystoma tigrinum nebulosum*. *Dis Aquat*  
573 *Organ* 85:1–6
- 574 Griffiths EC, Pedersen AB, Fenton A, Petchey OL (2014) Analysis of a summary network of co-  
575 infection in humans reveals that parasites interact most via shared resources Analysis of a  
576 summary network of co-infection in humans reveals that parasites interact most via shared  
577 resources.
- 578 Hoverman JT, Gray MJ, Haislip N a, Miller DL (2011) Phylogeny, life history, and ecology  
579 contribute to differences in amphibian susceptibility to ranaviruses. *Ecohealth* 8:301–19
- 580 Hoverman J, Gray M, Miller D (2010) Anuran susceptibilities to ranaviruses: role of species  
581 identity, exposure route, and a novel virus isolate. *Dis Aquat Organ* 89:97–107
- 582 Hoverman JT, Gray MJ, Miller DL, Haislip N a (2012) Widespread occurrence of ranavirus in  
583 pond-breeding amphibian populations. *Ecohealth* 9:36–48
- 584 Hoverman JT, Mihaljevic JR, Richgels KLD, Kerby JL, Johnson PTJ (2012) Widespread co-  
585 occurrence of virulent pathogens within California amphibian communities. *Ecohealth*  
586 9:288–92
- 587 Hudson PJ, Rizzoli A, Grenfell BT, Heesterbeek H, Dobson AP (Eds) (2002) *The Ecology of*  
588 *Wildlife Diseases*. Oxford University Press
- 589 Jancovich JK, Bremont M, Touchman JW, Jacobs BL (2010) Evidence for multiple recent host

- 590 species shifts among the Ranaviruses (family Iridoviridae). *J Virol* 84:2636–47
- 591 Jancovich JK, Davids EW, Seiler a, Jacobs BL, Collins JP (2001) Transmission of the  
592 *Ambystoma tigrinum* virus to alternative hosts. *Dis Aquat Organ* 46:159–63
- 593 Jancovich JK, Mao J, Chinchar VG, Wyatt C, Case ST, Kumar S, Valente G, Subramanian S,  
594 Davidson EW, Collins JP, Jacobs BL (2003) Genomic sequence of a ranavirus (family  
595 Iridoviridae) associated with salamander mortalities in North America. *Virology* 316:90–  
596 103
- 597 Johnson PTJ, Hoverman JT (2012) Parasite diversity and coinfection determine pathogen  
598 infection success and host fitness. *Proc Natl Acad Sci U S A* 109:9006–9011
- 599 Johnson P, Preston DL, Hoverman JT, LaFonte B (2013) Host and parasite diversity jointly  
600 control disease risk in complex communities. *Proc Natl Acad Sci* 110:16916–16921
- 601 Johnson PTJ, Preston DL, Hoverman JT, Richgels KLD (2013) Biodiversity decreases disease  
602 through predictable changes in host community competence. *Nature* 494:230–3
- 603 Johnson PTJ, Roode JC de, Fenton A (2015) Why infectious disease research needs community  
604 ecology. *Science* 349:1259504
- 605 Jolles AE, Ezenwa VO, Etienne RS, Turner WC, Olf H (2008) Interactions between  
606 macroparasites and microparasites drive infection patterns in free-ranging African buffalo.  
607 *Ecology* 89:2239–50
- 608 Kattenbelt J, Hyatt A, Gould A (2000) Recovery of ranavirus dsDNA from formalin-fixed  
609 archival material. *Dis Aquat Organ* 39:151–154
- 610 Keeling M, Rohani P (2008) Modeling infectious diseases in humans and animals. Princeton  
611 University Press
- 612 Knowles S, Fenton A, Petchey OL, Jones T, Barber R, Pedersen AB (2013) Stability of within-  
613 host–parasite communities in a wild mammal system. *Proc R Soc B-Biological Sci* 280
- 614 Lesbarrères D, Balseiro a, Brunner J, Chinchar VG, Duffus a, Kerby J, Miller DL, Robert J,  
615 Schock DM, Waltzek T, Gray MJ (2012) Ranavirus: past, present and future. *Biol Lett*  
616 8:481–3
- 617 Mideo N, Alizon S, Day T (2008) Linking within- and between-host dynamics in the  
618 evolutionary epidemiology of infectious diseases. *Trends Ecol Evol* 23:511–7
- 619 Mihaljevic JR (2012) Linking metacommunity theory and symbiont evolutionary ecology.  
620 *Trends Ecol Evol* 27:323–329
- 621 Miller D, Rajeev S (2007) Frog Virus 3 Infection, Cultured American Bullfrogs. *Emerg Infect ...*  
622 13:2006–2007
- 623 Nunn CL, Brezine C, Jolles AE, Ezenwa VO (2014) Interactions between micro- and  
624 macroparasites predict microparasite species richness across primates. *Am Nat* 183:494–  
625 505
- 626 Pedersen AB, Fenton A (2006) Emphasizing the ecology in parasite community ecology. *Trends*  
627 *Ecol Evol* 22:133–139
- 628 Petney TN, Andrews RH (1998) Multiparasite communities in animals and humans: Frequency,  
629 structure and pathogenic significance. *Int J Parasitol* 28:377–393

- 630 Picco AM, Brunner JL, Collins JP (2007) Susceptibility of the endangered California tiger  
631 salamander, *Ambystoma californiense*, to ranavirus infection. *J Wildl Dis* 43:286–90
- 632 Read AF, Taylor LH (2001) The Ecology of Genetically Diverse Infections. *Science* (80- )  
633 292:1099–1102
- 634 Ridenhour BJ, Storfer AT (2008) Geographically variable selection in *Ambystoma tigrinum*  
635 virus (Iridoviridae) throughout the western USA. *J Evol Biol* 21:1151–9
- 636 Rigaud T, Perrot-Minnot M-J, Brown MJF (2010) Parasite and host assemblages: embracing the  
637 reality will improve our knowledge of parasite transmission and virulence. *Proc Biol Sci*  
638 277:3693–3702
- 639 Roode JC de, Pansini R, Cheesman SJ, Helinski MEH, Huijben S, Wargo AR, Bell AS, Chan  
640 BHK, Walliker D, Read AF (2005) Virulence and competitive ability in genetically diverse  
641 malaria infections. *Proc Natl Acad Sci U S A* 102:7624–8
- 642 Schock DM, Bollinger TK, Gregory Chinchar V, Jancovich JK, Collins JP (2008) Experimental  
643 Evidence that Amphibian Ranaviruses Are Multi-Host Pathogens. *Copeia* 2008:133–143
- 644 Seabloom EW, Borer ET, Gross K, Kendig AE, Lacroix C, Mitchell CE, Mordecai E a., Power  
645 AG (2015) The community ecology of pathogens: coinfection, coexistence and community  
646 composition. *Ecol Lett* 18:401–415
- 647 Sofonea MT, Alizon S, Michalakis Y (2015) From within-host interactions to epidemiological  
648 competition: a general model for multiple infections. *Philos Trans R Soc B-Biological Sci*  
649 370
- 650 Stutz WE, Blaustein AR, Briggs CJ, Hoverman JT, Rohr JR, Johnson PTJ (2018) Using multi-  
651 response models to investigate pathogen coinfections across scales: Insights from emerging  
652 diseases of amphibians. *Methods Ecol Evol* 9:1109–1120
- 653 Team RC (2013) R: A language and environment for statistical computing.
- 654 Tompkins DM, Dunn AM, Smith MJ, Telfer S (2010) Wildlife diseases: from individuals to  
655 ecosystems. *J Anim Ecol* 4:1–20
- 656 Tornabene BJ, Blaustein AR, Briggs CJ, Calhoun DM, Johnson PTJ, McDevitt-Galles T, Rohr  
657 JR, Hoverman JT The influence of landscape and environmental factors on ranavirus  
658 epidemiology in amphibian assemblages. *Freshw Biol*
- 659

660 **Table Legends and Tables**

661

662 **Table 1.** Effects of co-exposure on the proportion of *Rana aurora* hosts that became infected.

663 The median and 95% credible interval (CI; the Bayesian analog to the 95% confidence interval)

664 are shown for the coefficients in the logistic model. In general, effects whose 95% CI do not

665 overlap zero are considered biologically meaningful. Co-exposure effects whose 95% CI do not

666 overlap zero demonstrate an effect of co-exposure over and above any effects of dosage. These

667 meaningful co-exposure effects are bolded.

| Effect                                                  |                 | Median Coefficient | 95% CI               |
|---------------------------------------------------------|-----------------|--------------------|----------------------|
| Baseline effects of each virus                          | ATV             | -8.72              | (-20.03, -3.28)      |
|                                                         | FV3             | -1.44              | (-2.59, -0.50)       |
|                                                         | RFV3            | -0.78              | (-1.68, 0.08)        |
| Effects of double-dose, compared to baseline            | Double:ATV      | 1.60               | (-7.53, 12.80)       |
|                                                         | Double:FV3      | 1.22               | (-0.01, 2.61)        |
|                                                         | Double:RFV3     | -0.17              | (-1.47, 1.03)        |
| Co-exposure effects, above and beyond effects of dosage | FV3:RFV3        | 0.40               | (-1.04, 1.84)        |
|                                                         | <b>ATV:RFV3</b> | <b>8.52</b>        | <b>(4.16, 16.75)</b> |
|                                                         | <b>ATV:FV3</b>  | <b>8.64</b>        | <b>(4.32, 16.94)</b> |

668

669 **Table 2.** Effects of co-exposure on the log-transformed viral concentration (viral DNA copy  
 670 number per total ng of DNA in the sample) of infected *Rana aurora* hosts. We refer to viral  
 671 concentration as viral load for clarity. The median and 95% credible interval are shown for the  
 672 coefficients in the linear model. Because there is no baseline effect of ATV included in these  
 673 models due to zero ATV-infected individuals, the effects of co-exposure are compared to the  
 674 single dose cases. Thus, the meaningful effect of the ATV:FV3 co-exposure shows that this  
 675 treatment led to higher viral loads compared to the single-dose FV3 treatment. <sup>a</sup>The effect of  
 676 double dose on FV3 viral load was marginal, whereby the 94.4% CI does not overlap zero (i.e.  
 677 an  $\alpha = 0.056$  in frequentist statistics).  
 678

| Effect                                              |                    | Median Coefficient | 95% CI                     |
|-----------------------------------------------------|--------------------|--------------------|----------------------------|
| Baseline viral load (i.e. average across all cases) | Intercept          | 0.680              | (-4.30, 5.76)              |
| Effect of mortality                                 | <b>Died</b>        | <b>5.55</b>        | <b>(3.89, 7.16)</b>        |
| Effect of each virus, compared to baseline          | FV3                | -2.18              | (-8.03, 2.43)              |
|                                                     | RFV3               | -2.78              | (-7.74, 3.40)              |
| Effects of double dosage, compared to single dosage | <i>Double:FV3</i>  | 3.23               | (-0.08, 6.59) <sup>a</sup> |
|                                                     | <b>Double:RFV3</b> | <b>1.78</b>        | <b>(0.01, 6.2)</b>         |
| Effects of co-exposure, compared to single dosage   | FV3:RFV3           | -0.706             | (-6.17, 4.8)               |
|                                                     | ATV:RFV3           | 0.166              | (-2.48, 2.96)              |
|                                                     | <b>ATV:FV3</b>     | <b>3.39</b>        | <b>(1.01, 5.78)</b>        |

679

680 **Table 3.** Effects of time and co-exposure on the prevalence of infection in experimental  
681 *Pseudacris triseriata* populations. As in Table 1, the median and 95% credible interval are  
682 shown for the coefficients in the logistic model. The meaningful interaction was driven by a  
683 more substantial increase in prevalence over time in the FV3-only treatment group (Fig. 2).  
684

| <b>Effect</b>          |                         | <b>Median Coefficient</b> | <b>95% CI</b>         |
|------------------------|-------------------------|---------------------------|-----------------------|
| Time effects (factors) | 4dpe                    | -0.329                    | (-10.26, 9.56)        |
|                        | 21dpe                   | 3.88                      | (-6.24, 14.12)        |
| Treatment effects      | FV3                     | 0.643                     | (-9.25, 10.62)        |
|                        | FV3+ATV                 | 3.23                      | (-7.18, 13.68)        |
| Interaction effect     | <b>Time x Treatment</b> | <b>-1.90</b>              | <b>(-3.43, -0.45)</b> |

685

686

687 **Table 4.** Effects of time and co-exposure on the prevalence of the viral concentration (viral load)  
 688 in infected *Pseudacris triseriata*. The median and 95% credible interval are shown for the  
 689 coefficients in the linear model. In this model we included a random effect of replicate  
 690 population on the intercept, and therefore the random effect standard deviation and residual  
 691 standard deviation are shown.

| <b>Effect</b>                                       |                             | <b>Median Coefficient</b> | <b>95% CI</b>       |
|-----------------------------------------------------|-----------------------------|---------------------------|---------------------|
| Baseline viral load (i.e. average across all cases) | Intercept                   | 4.35                      | (-3.61, 12.42)      |
| Effect of mortality                                 | <b>Died</b>                 | <b>3.01</b>               | <b>(0.17, 5.82)</b> |
| Time effects (factor)                               | 4dpe                        | -1.69                     | (-7.84, 4.5)        |
|                                                     | 21dpe                       | 0.716                     | (-6.66, 8.3)        |
| Treatment effects                                   | FV3                         | 1.33                      | (-5.11, 7.71)       |
|                                                     | FV3+ATV                     | -2.16                     | (-9.6, 5.77)        |
| Interaction                                         | Time x Treatment            | 0.724                     | (-2.92, 4.2)        |
| Standard deviation among replicates                 | $\sigma_{\text{replicate}}$ | 1.40                      | (0.15, 3.45)        |
| Residual standard deviation                         | $\sigma_{\text{residual}}$  | 3.88                      | (3.2, 4.86)         |

692

693



694 **Figure Legends and Figures**

695 **Figure 1.** (a) Proportion of *Rana auora* individuals infected in all experimental groups from  
696 experiment 1. Gray points are the median predictions from the statistical model, and gray bars  
697 represent the estimated 95% credible intervals to show error in our estimates. (b) Boxplots of  
698 viral copy number per treatment group, with gray points representing the viral load of each  
699 measured host. The box represents the inter-quartile range (IQR; between first and third  
700 quartiles), and the center line marks the median value. The whiskers extend from the box to the  
701 highest or lowest value that is within 1.5 x IQR.

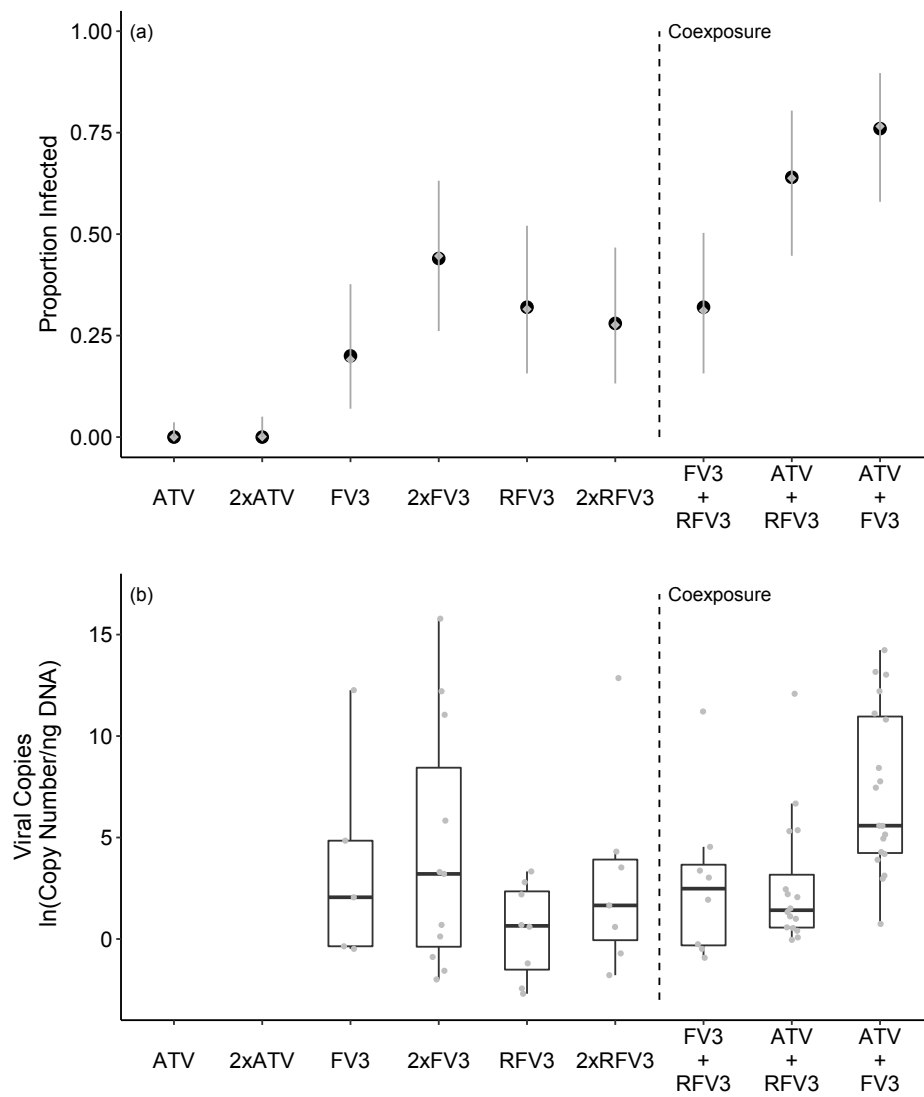

702

703 **Figure 2.** Proportion of *Pseudacris triseriata* infected individuals between time points and  
704 treatments in experiment 2. Time point are distinguished by color, as depicted in the legend.  
705 Large, bold circles represent the mean prevalence, and error bars represent one standard error of  
706 this mean. Smaller and more opaque circles represent the prevalence of the replicate larval  
707 populations. Note that all 3 replicates of the FV3-only treatment at 21dpe had the same  
708 prevalence.

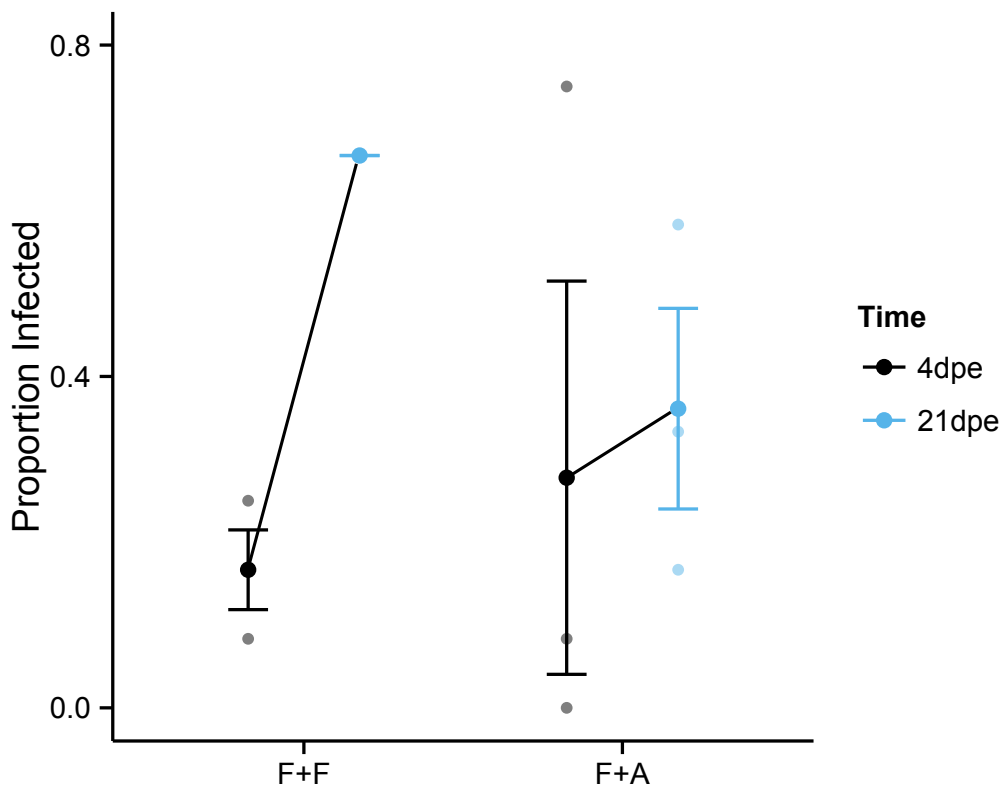

709

710

711 **Figure 3.** Viral copy number across time points and treatments in experiment 2 with *Pseudacris*  
712 *triseriata*. ATV-only treatments are not shown, because only 3 total individuals became infected,  
713 all in the 21dep treatments (one individual per replicate). Time points are distinguished by color,  
714 as depicted in the legend. Large, closed circles represent the mean viral load, and error bars  
715 represent one standard error of the mean. Smaller closed circles represent the viral load of  
716 infected individuals that survived until the end of the experiment (or until destructive sampling in  
717 the case of 4dpe replicates). Open triangles represent infected individuals that died prior to the  
718 end of the experiment. A jitter is added to the data for ease of interpretation. Notice the most  
719 heavily infected individual from the FV3+ATV treatment at 4dpe.  
720

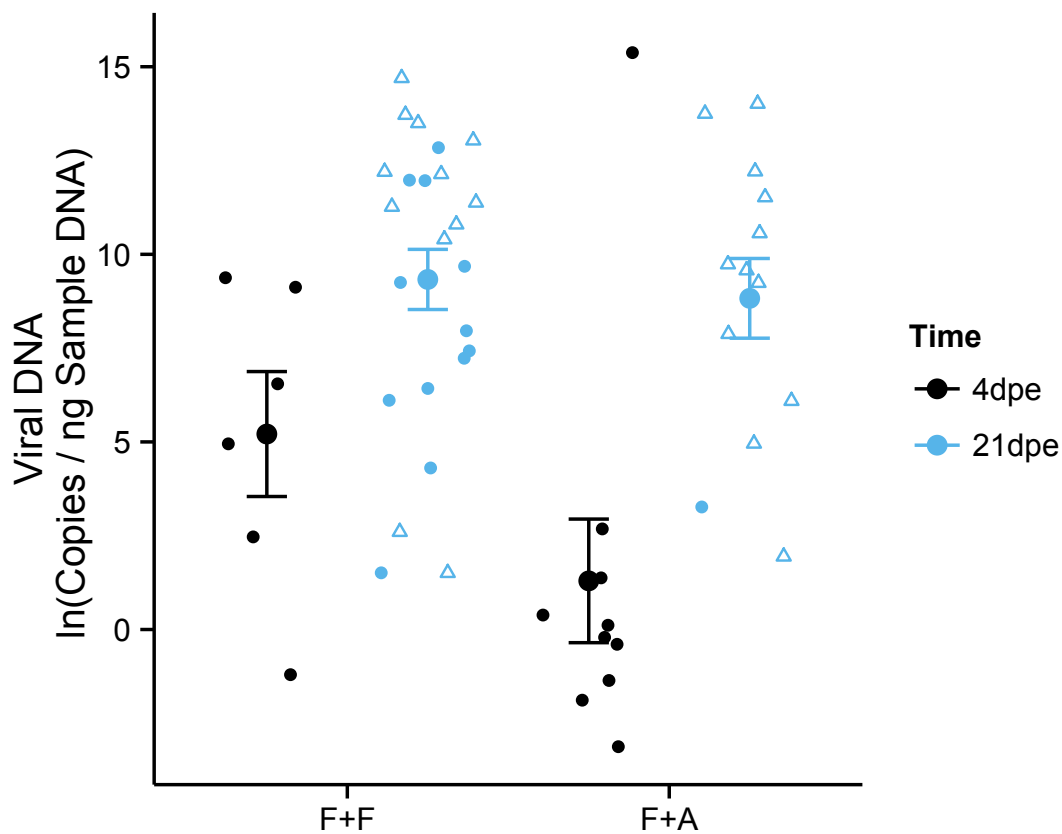

721

722 **Figure A1.** Survival curves for all treatments in experiment 1 with *Rana aurora*.

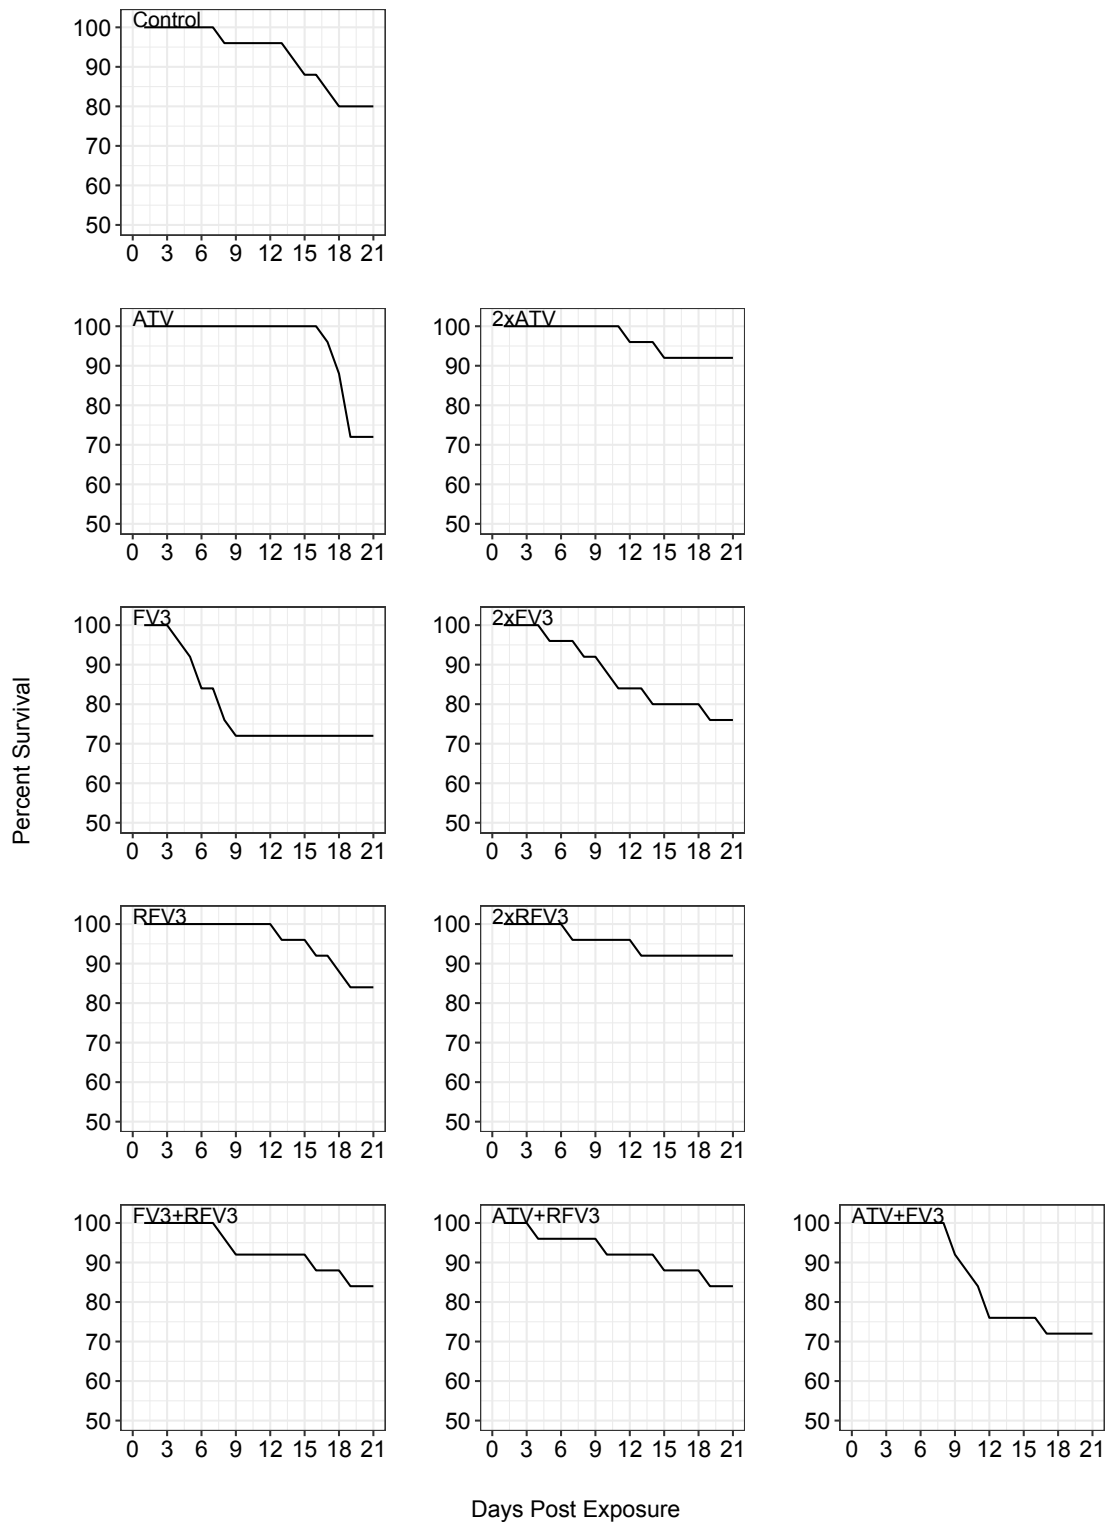

723

724

725 **Figure A2.** Boxplots (as in Figure 2) of viral load for infected *Rana aurora* that survived until  
726 the end of the experiment (Alive) or that died due to infection (Died).

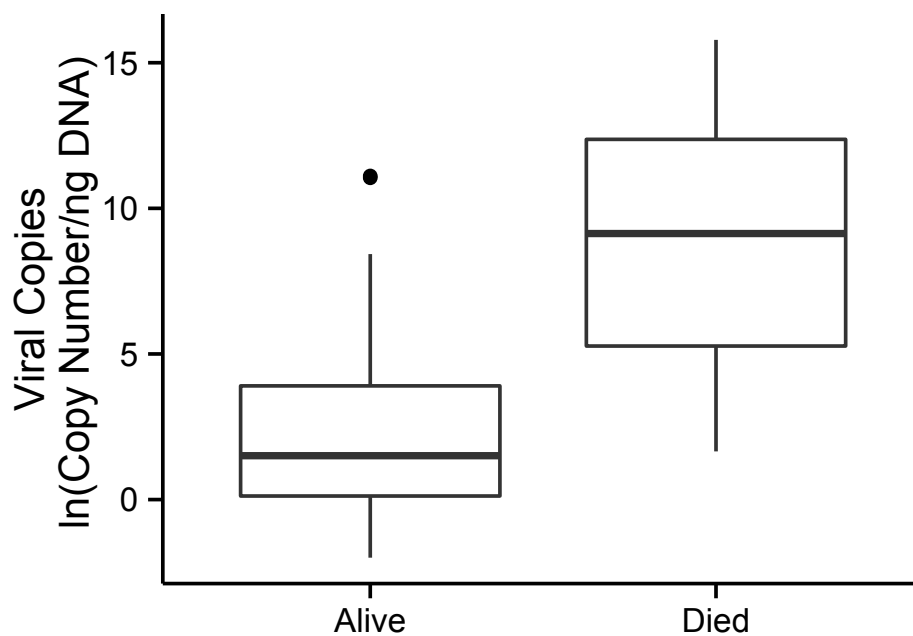

727
